# Supplementary material for: Reduction of oligomer size modulates the competition between cluster formation and phase separation of the tumor suppressor SPOP
Source: PubMed Central journal article supplement — bioRxiv. 2023 Mar 21:2023.02.11.528154. Preprint. [Version 2] doi: 10.1101/2023.02.11.528154 (PMC10054981; doi:10.1101/2023.02.11.528154), 2023-03-21
Supplement: NIHPP2023.02.11.528154V2-suppplement-1.pdf [file NIHPP2023.02.11.528154V2-suppplement-1.pdf]

## SI Figures

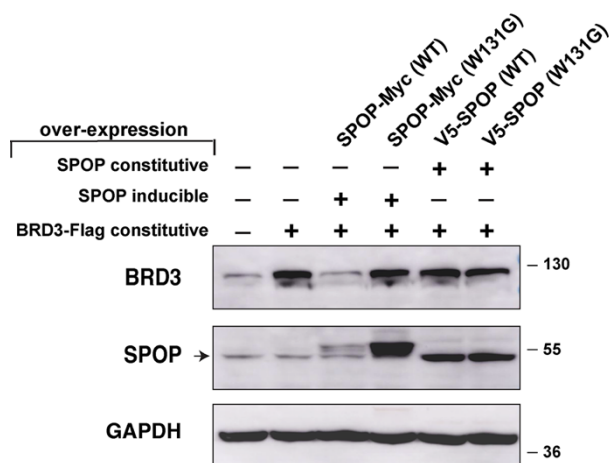

**Figure S1. SPOP expression induced close to endogenous levels mediates BRD3 turnover.**

T-REx cells were transfected with plasmids for BRD3-Flag and SPOP-Myc (inducible expression) or V5-SPOP (constitutive expression). Twenty-four hours post-transfection, cells were lysed, and the resulting lysates were immunoblotted using antibodies for BRD3, SPOP, and GAPDH (loading control). The expected difference in BRD3 turnover for cells expressing SPOP<sup>WT</sup> and SPOP<sup>W131G</sup> is more pronounced with the induced-expression SPOP constructs.

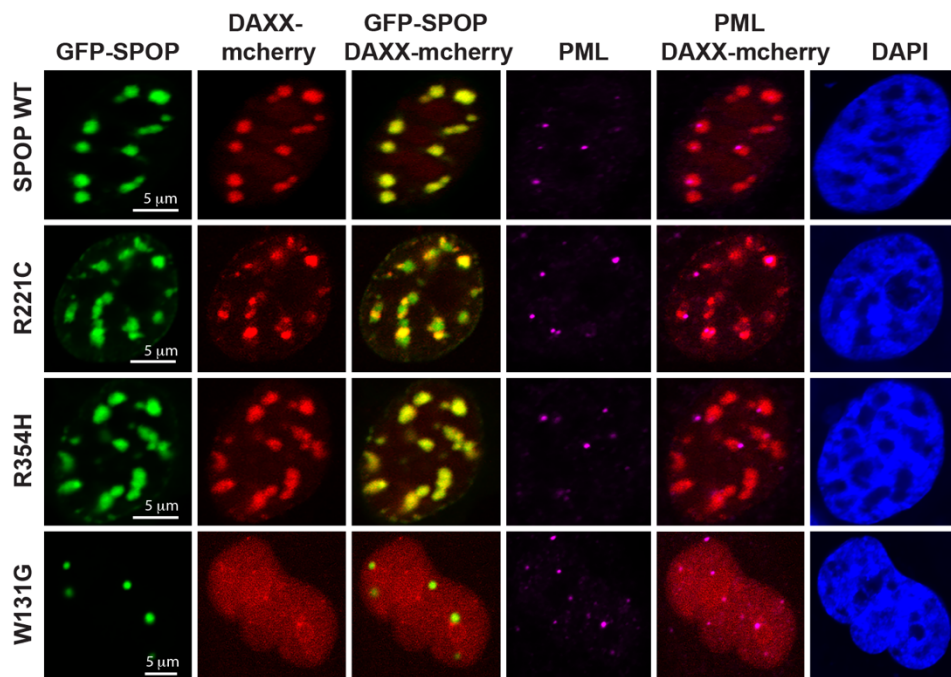

**Figure S2.**

Representative fluorescence confocal images of HeLa cells expressing GFP-SPOP and DAXX-mCherry constructs. Cells were transfected with the indicated plasmids. Twenty-four hours post-transfection, cells were fixed and immuno-stained using an antibody against PML bodies (magenta). DAPI (blue) marks nuclear DNA.
